# Supplementary material for: Decoding first complete chloroplast genome of toothbrush tree (Salvadora persica L.): insight into genome evolution, sequence divergence and phylogenetic relationship within Brassicales
Source: PubMed Central journal article supplement (PMC8086069; doi:10.1186/s12864-021-07626-x), 2021-04-30

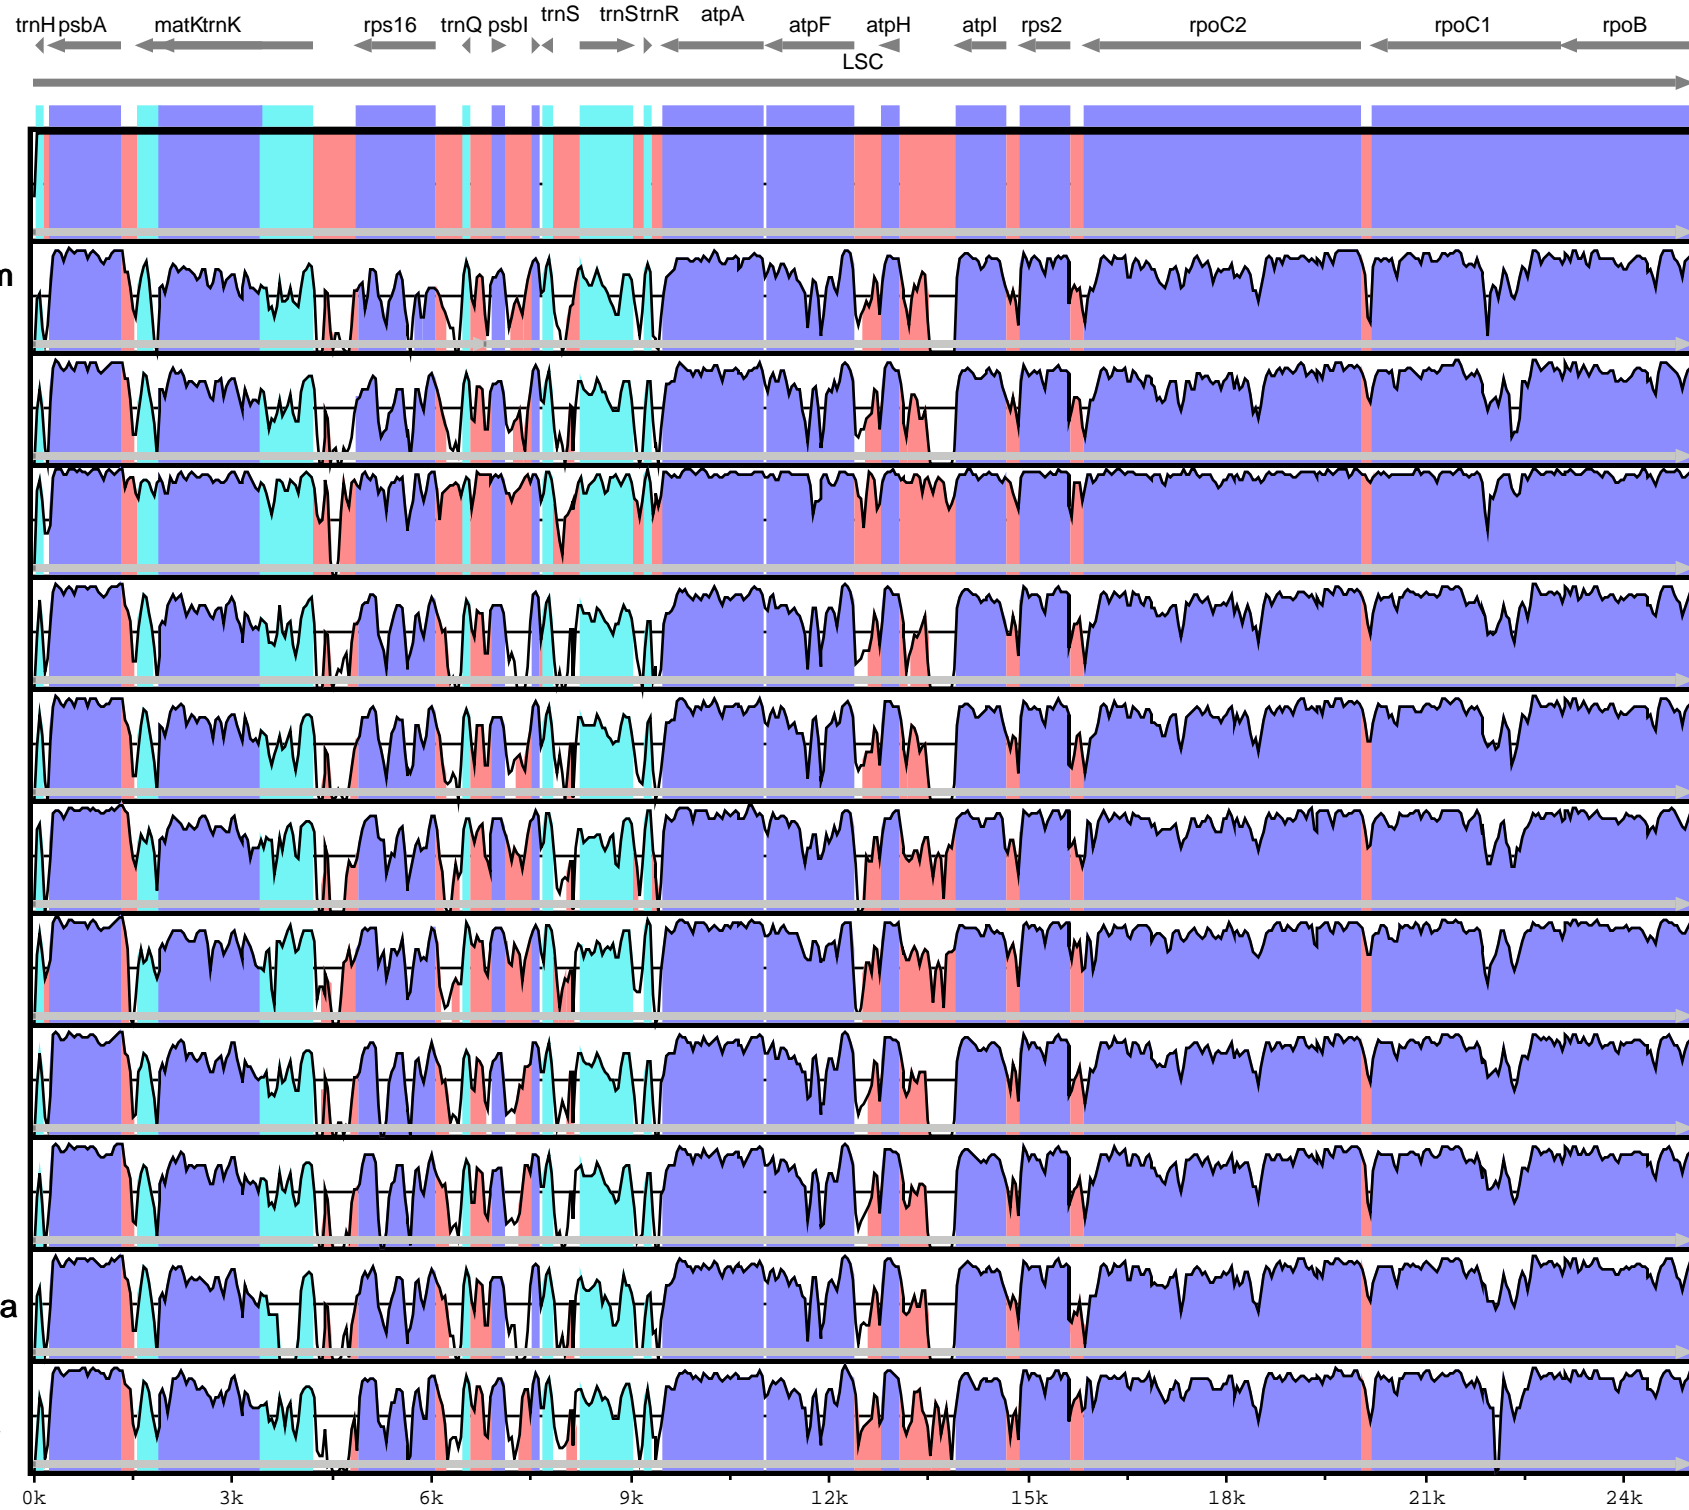

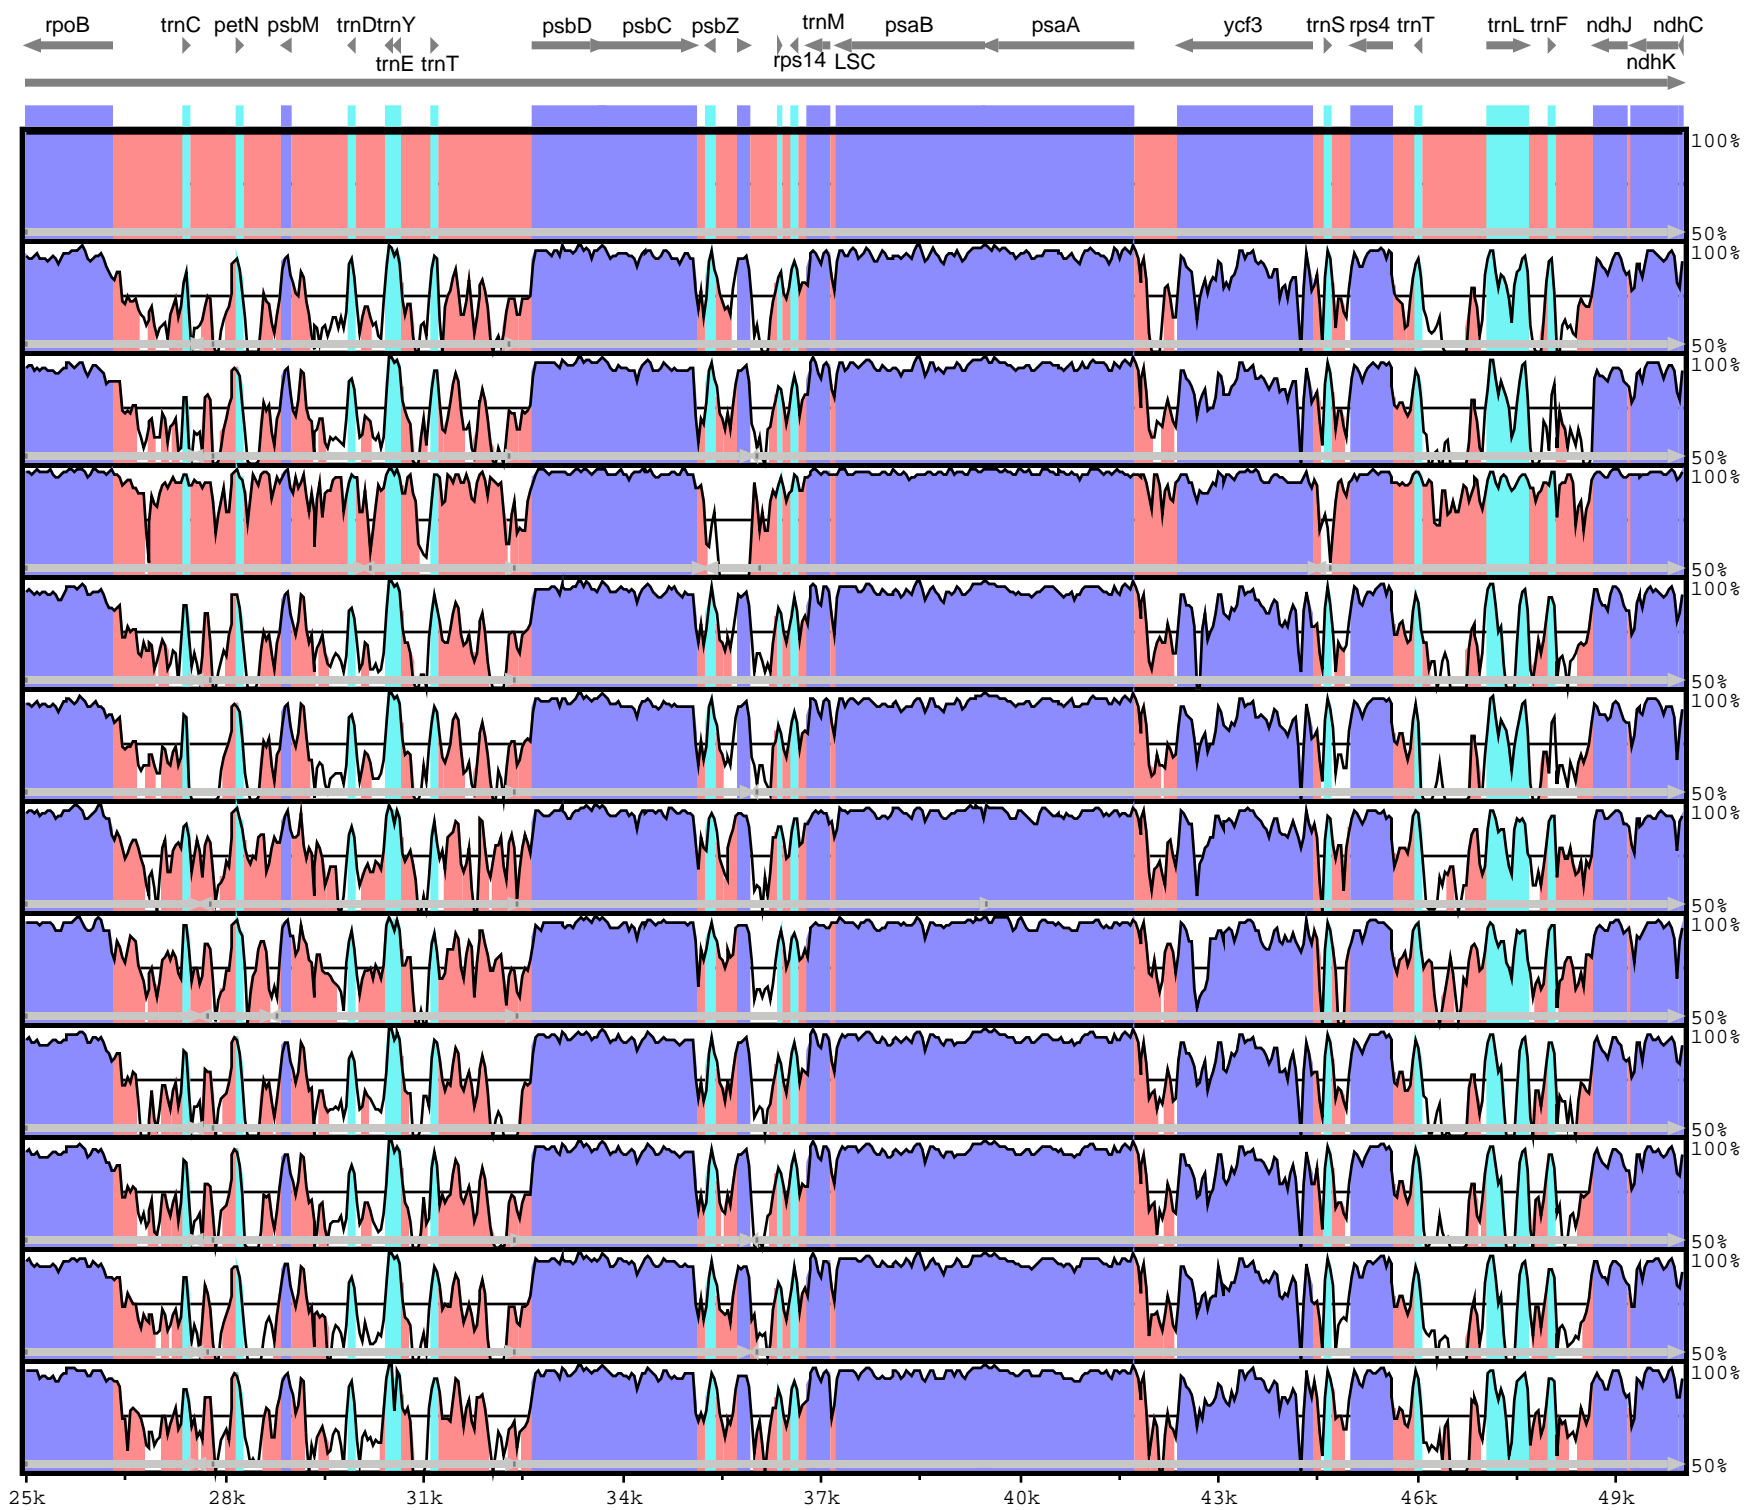



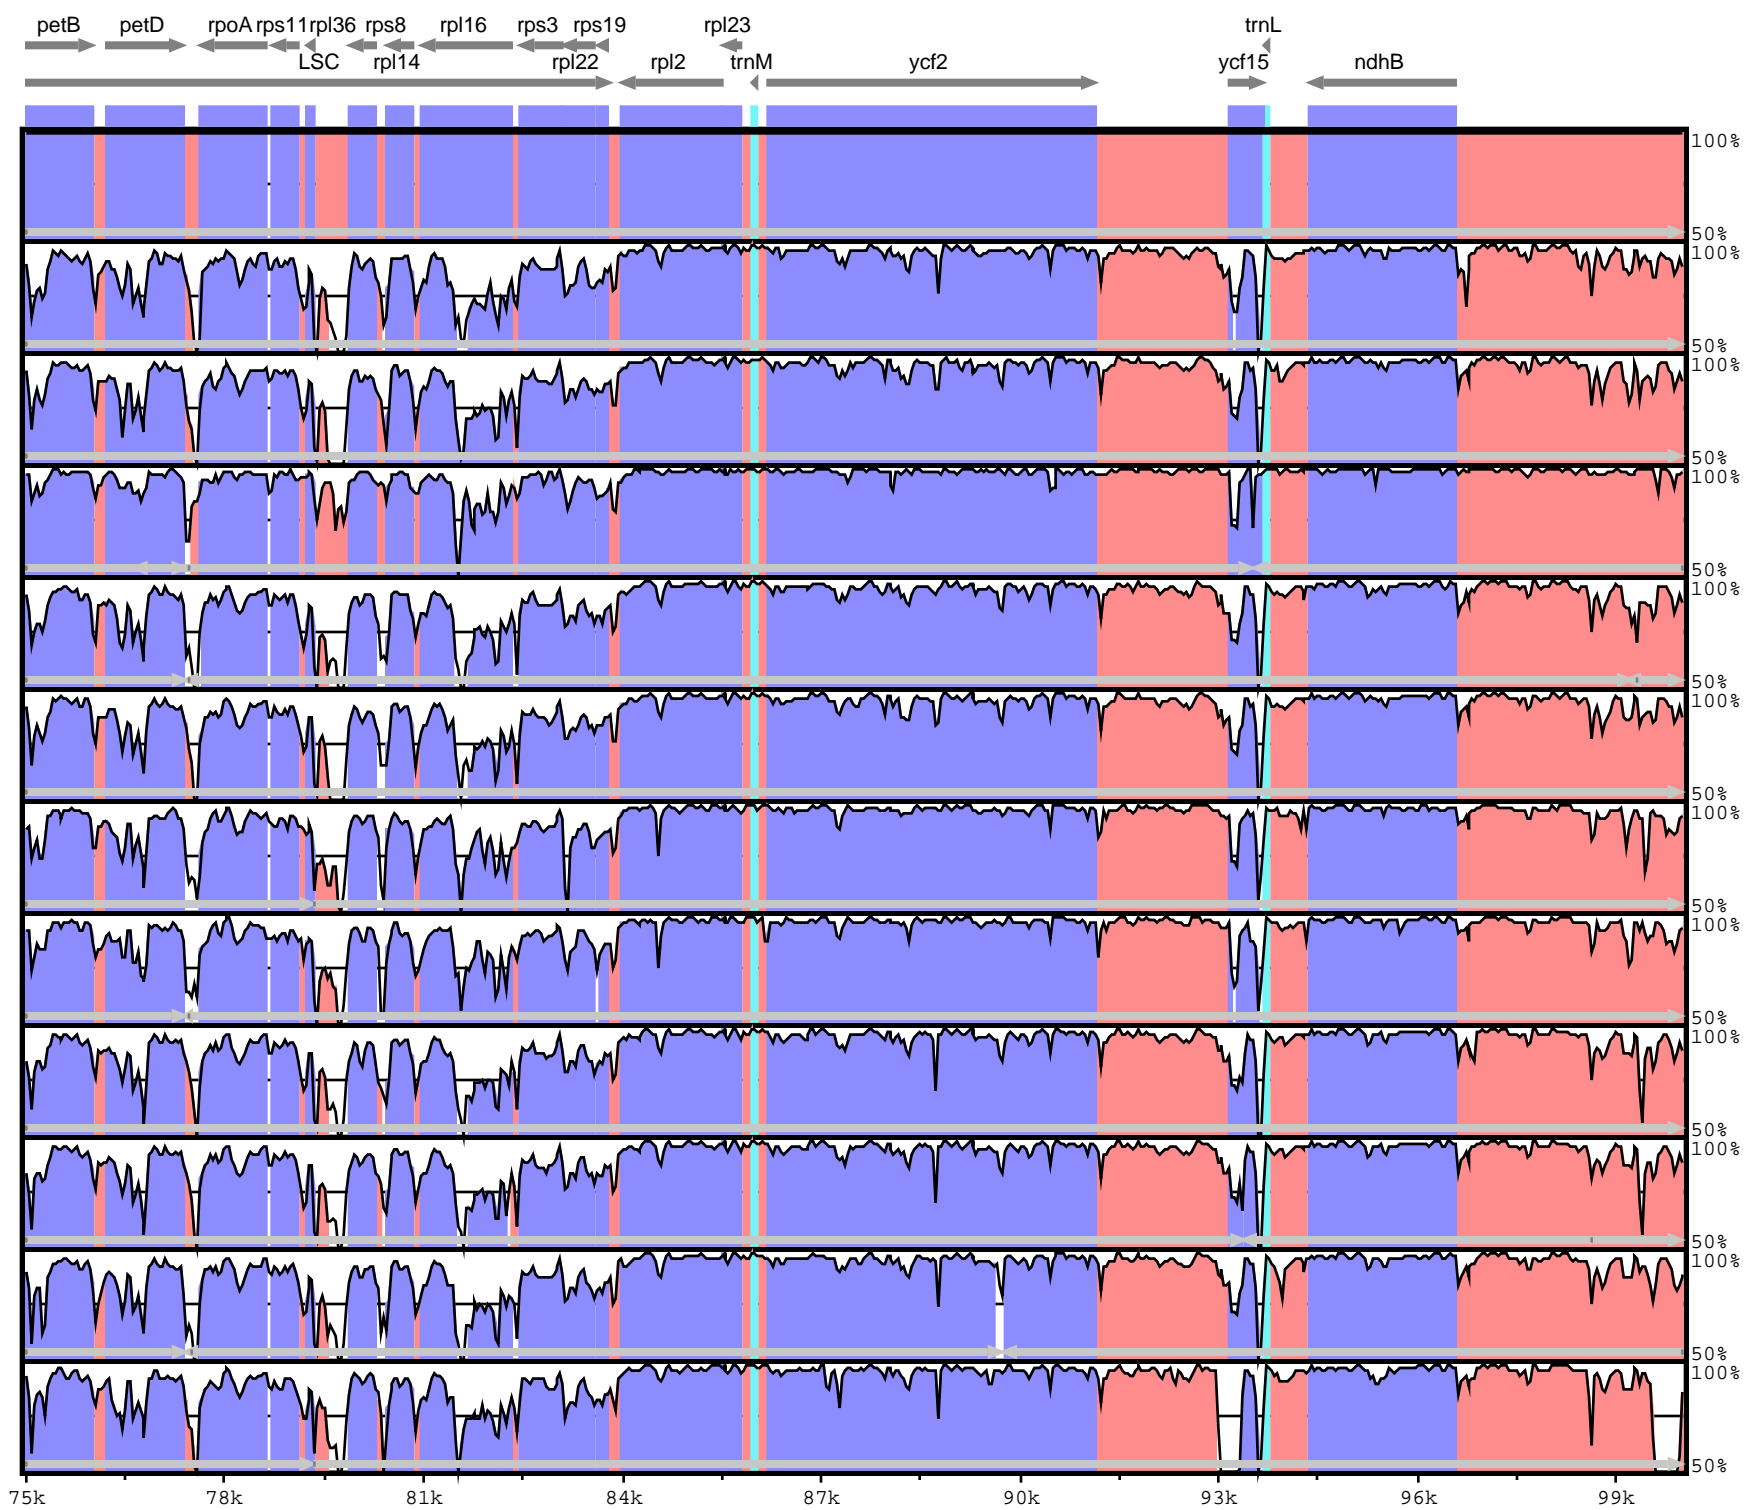

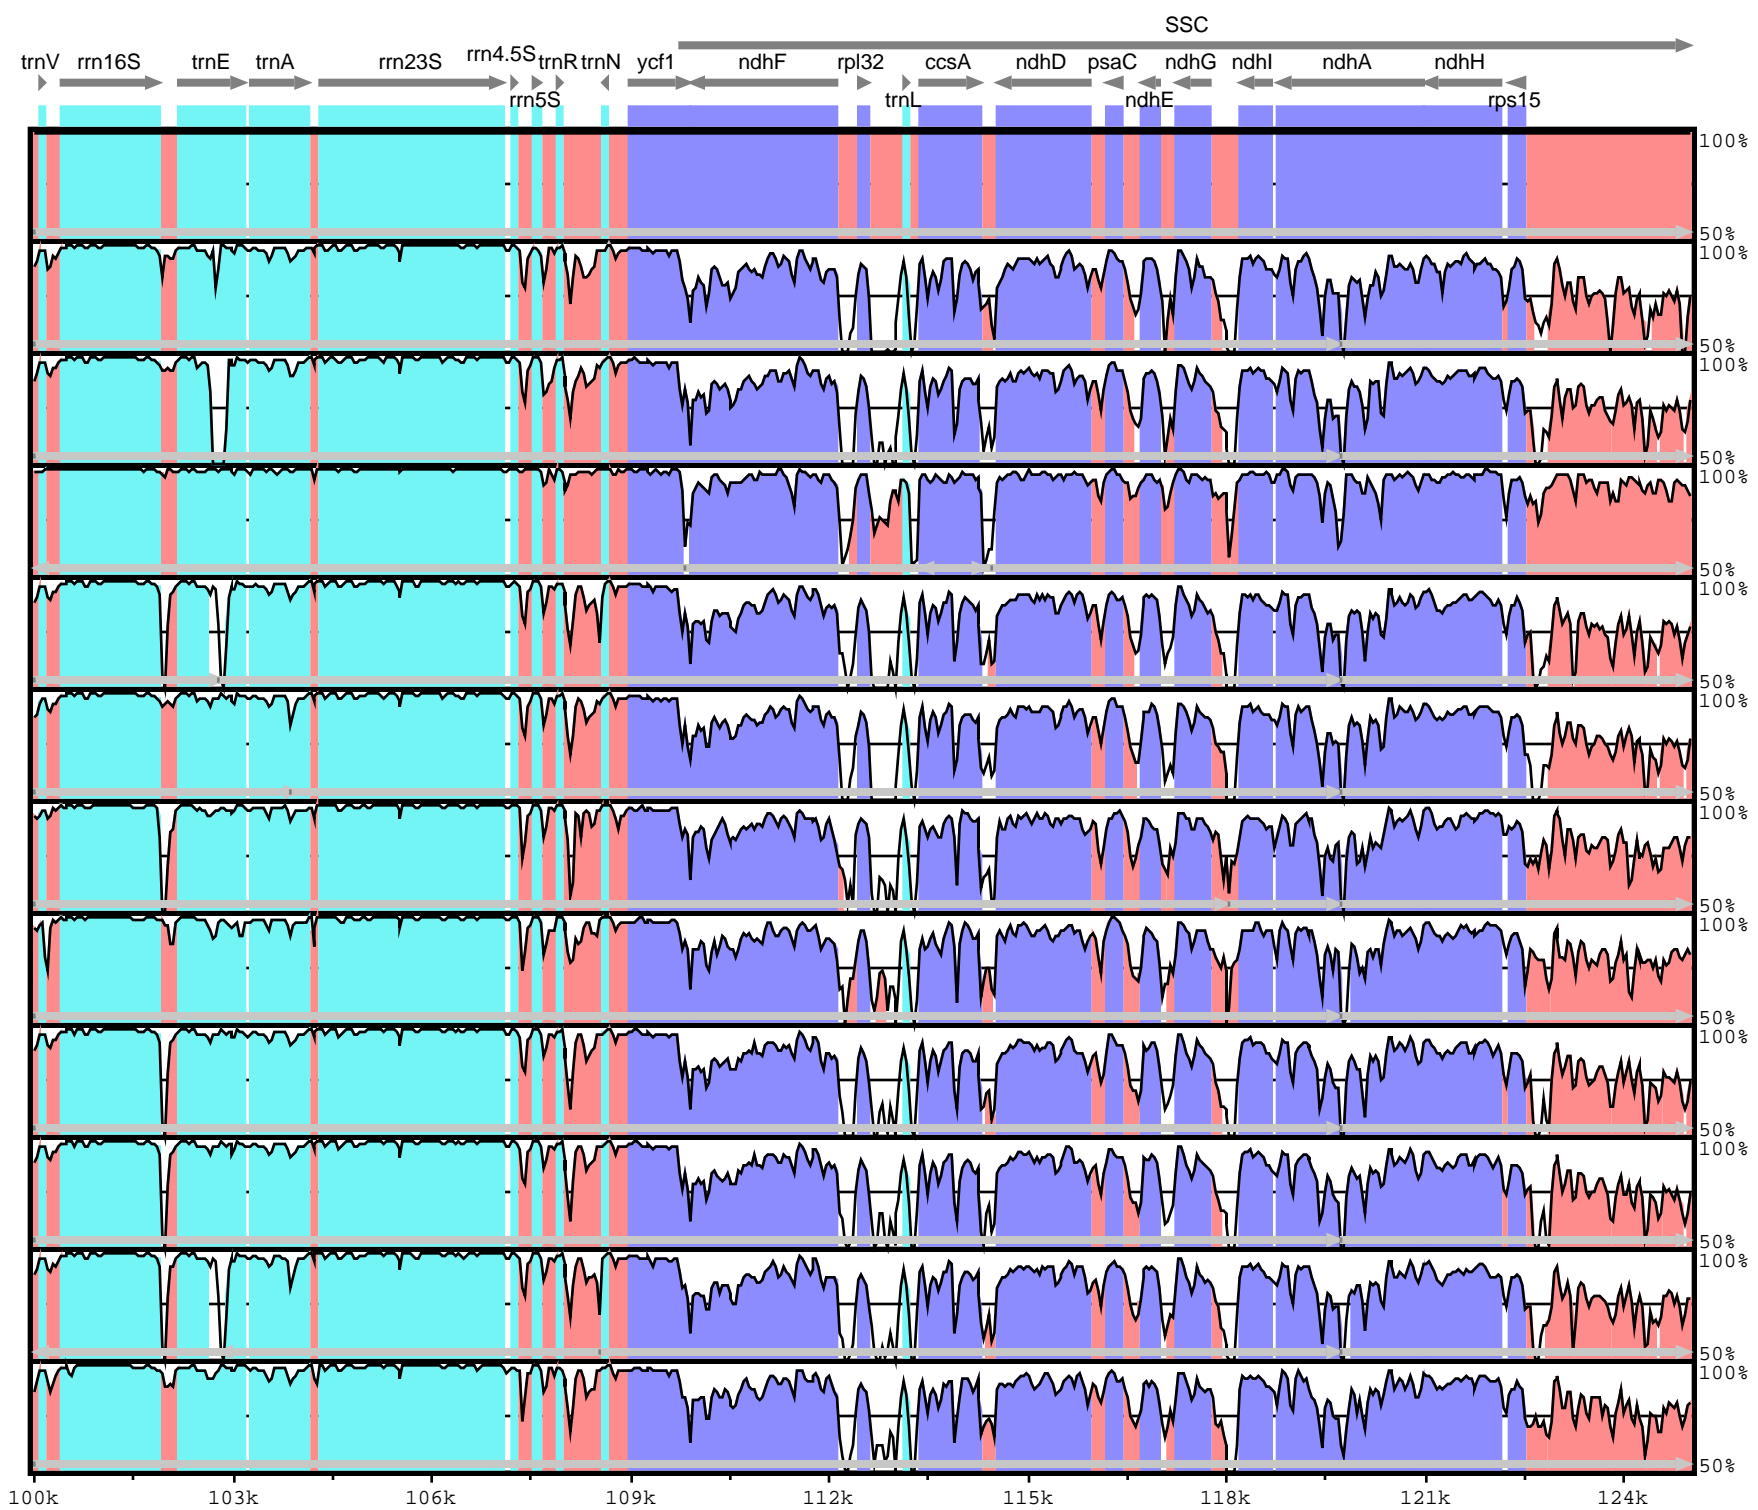

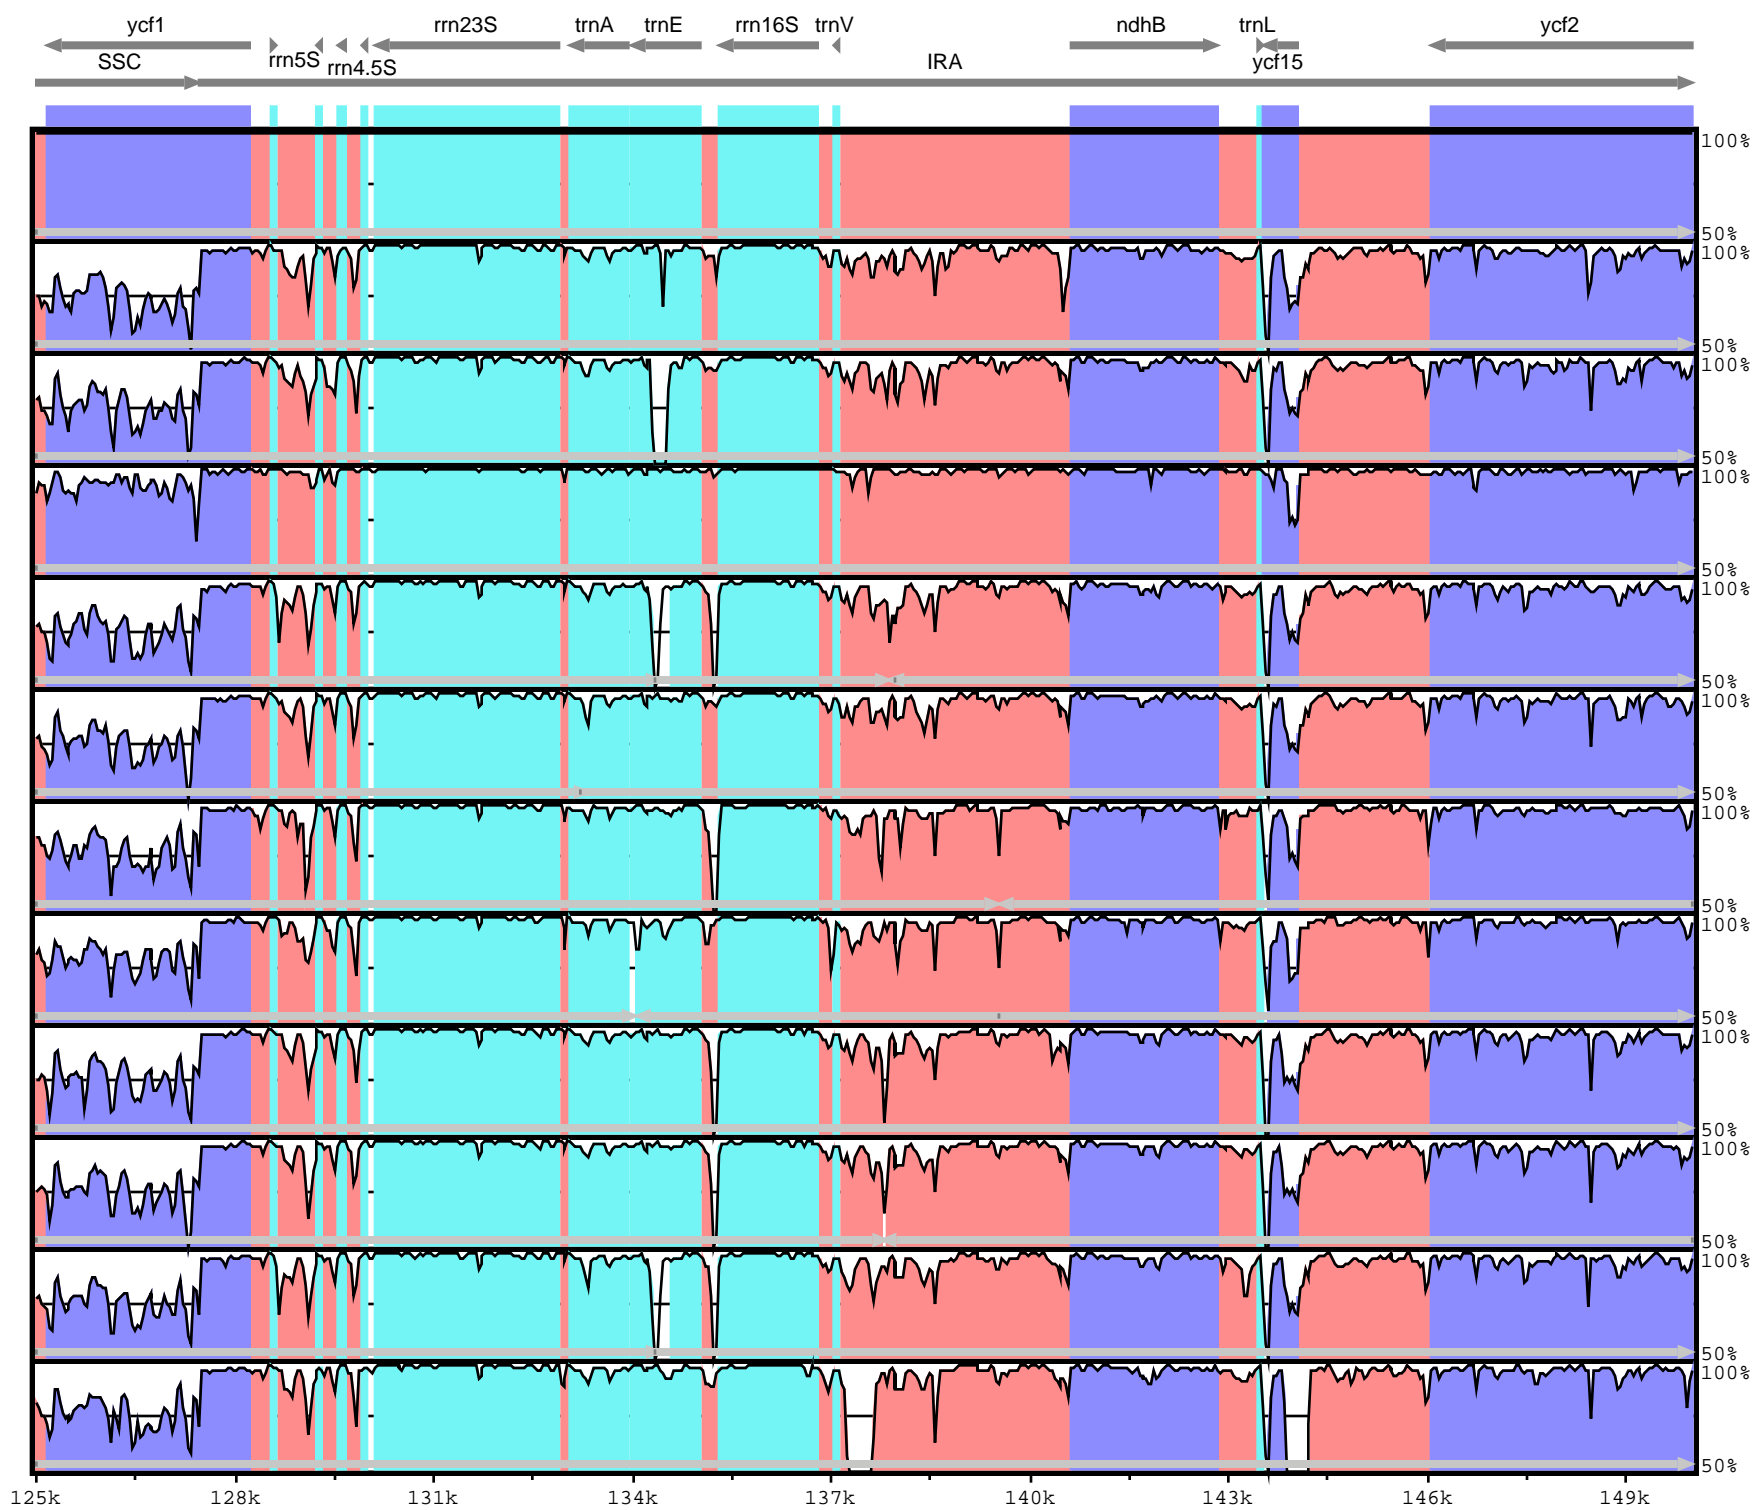

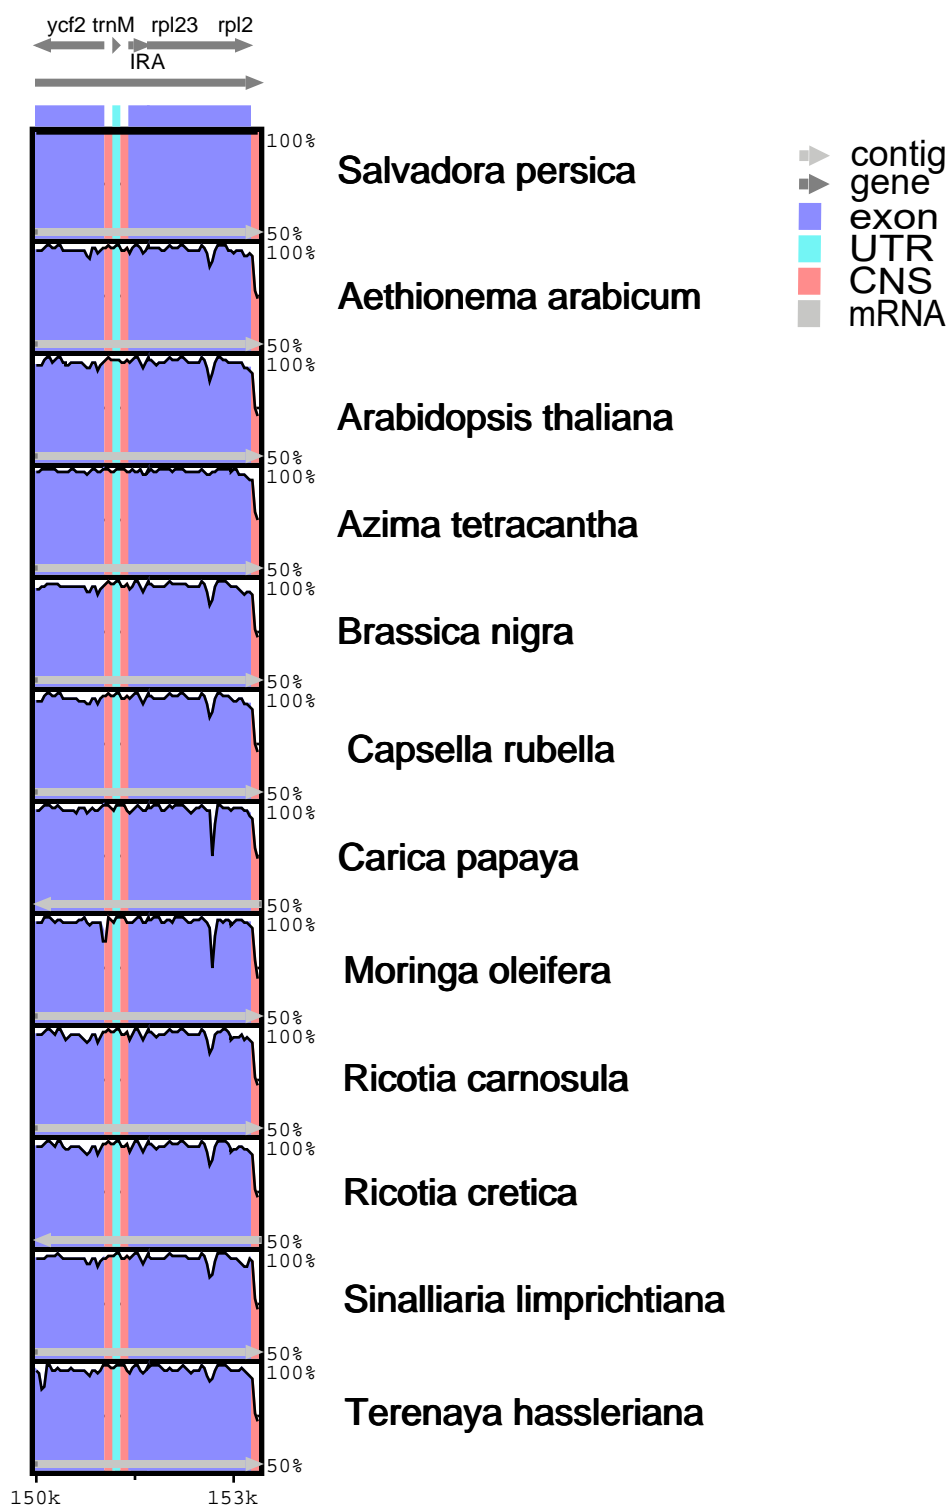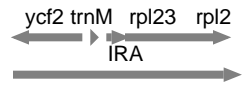

Supplement: 12864_2021_7626_MOESM1_ESM.pdf [file 12864_2021_7626_MOESM1_ESM.pdf]
